# Supplementary material for: Hydrophobic association and solvation of neopentane in urea, TMAO and urea–TMAO solutions
Source: Royal Society of Chemistry journal article supplement (doi:10.1039/d1cp05321c), 2022-01-01
Supplement: d1cp05321c1.pdf [file d1cp05321c1.pdf]

## Supplementary Material for

### Hydrophobic association and solvation of neopentane in Urea, TMAO and Urea-TMAO solution

Timir Hajari<sup>\*,†,1</sup>, Mayank Dixit<sup>\*,†,2</sup> and Hari O. S. Yadav<sup>3</sup>

\*These authors equally contributed to this work.

Dr. Timir Hajari

<sup>1</sup>Department of chemistry, City College, 102/1, Raja Rammohan Sarani, Kolkata - 700 009, India

E-mail: timir230@gmail.com

Mayank Dixit

<sup>2</sup>Researcher, Graduate School of Engineering, Department of Chemical Engineering Kyoto

University-Katsura Nishikyo-ku, Kyoto-shi, Kyoto-fu, 615-8510, Japan

E-mail: mayankdixit.kyoto.iitb@gmail.com and dixit@cheme.kyoto-u.ac.jp

Hari O. S. Yadav

<sup>3</sup>Postdoctoral Fellow, Department of Materials Chemistry, Nagoya University, Furo-cho, Chikusa-

ku, Nagoya, 464-8603

E-mail: hariyadav.iitd@gmail.com and hari.yadav@chembio.nagoya-u.ac.jp

†Corresponding authors. Email: timir230@gmail.com and mayankdixit.kyoto.iitb@gmail.com

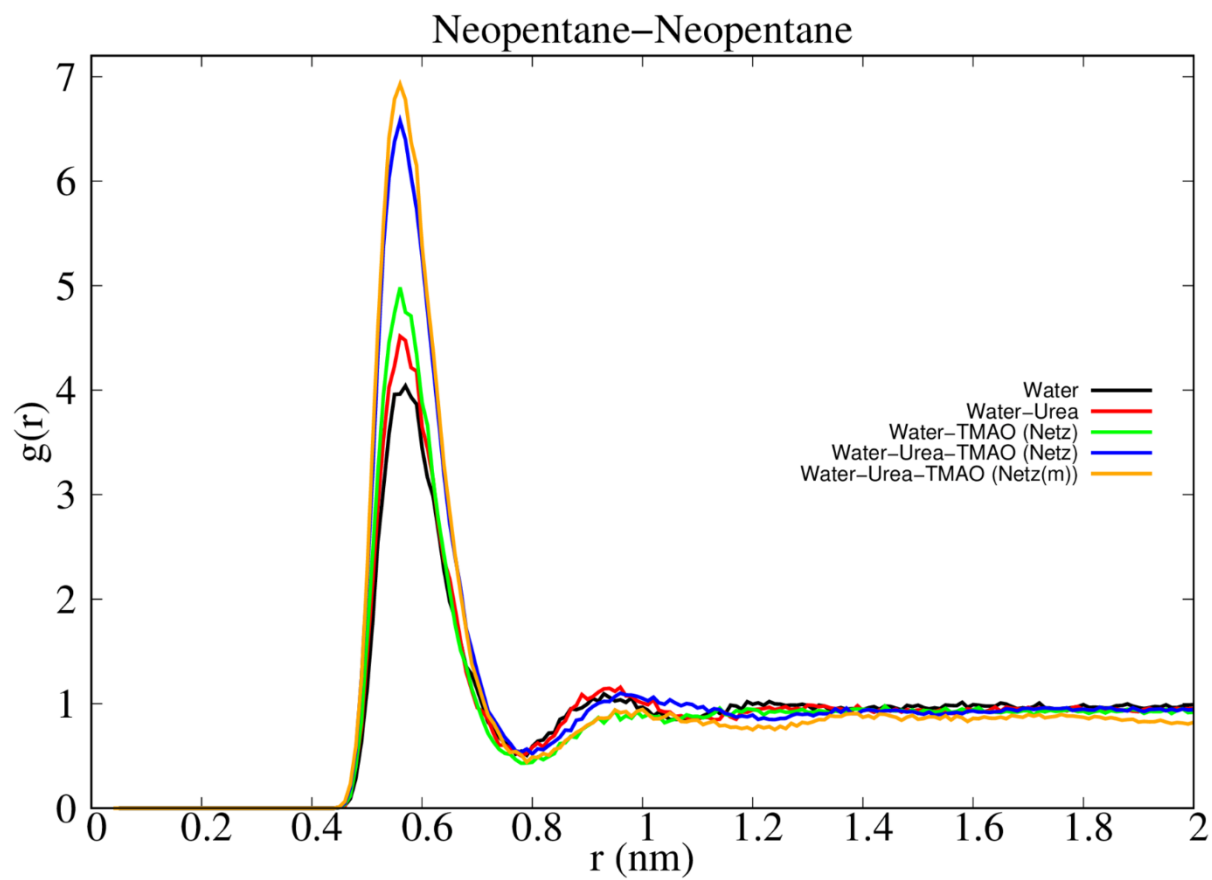

**Fig. S1.** Radial distribution functions between neopentane-neopentane in water-TMAO (Netz), Water-urea, Water-urea-TMAO (Netz) and water-urea-TMAO (Netz(m)) mixtures.

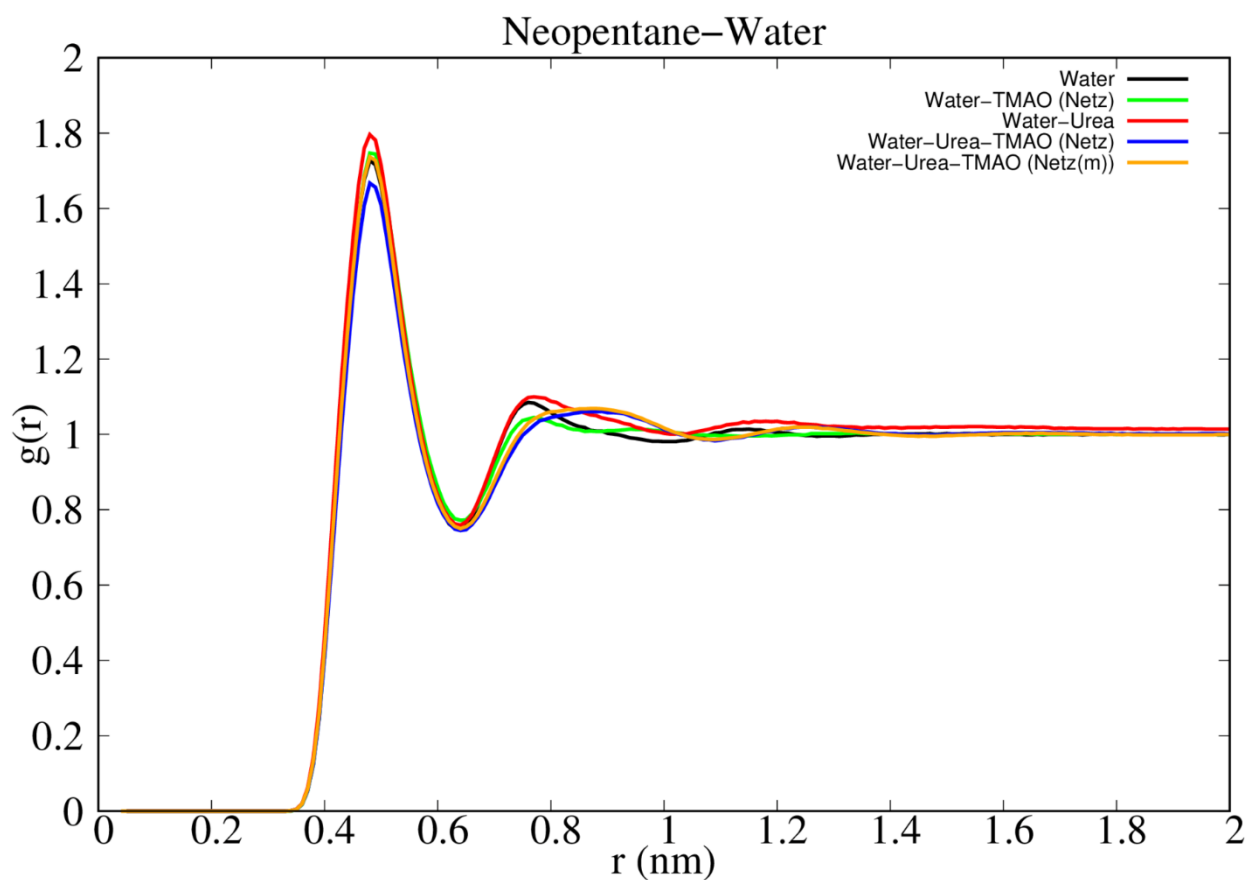

**Fig. S2.** Radial distribution functions between neopentane-water in water, water-TMAO (Netz), Water-urea, Water-urea-TMAO (Netz) and water-urea-TMAO (Netz(m)) mixtures.

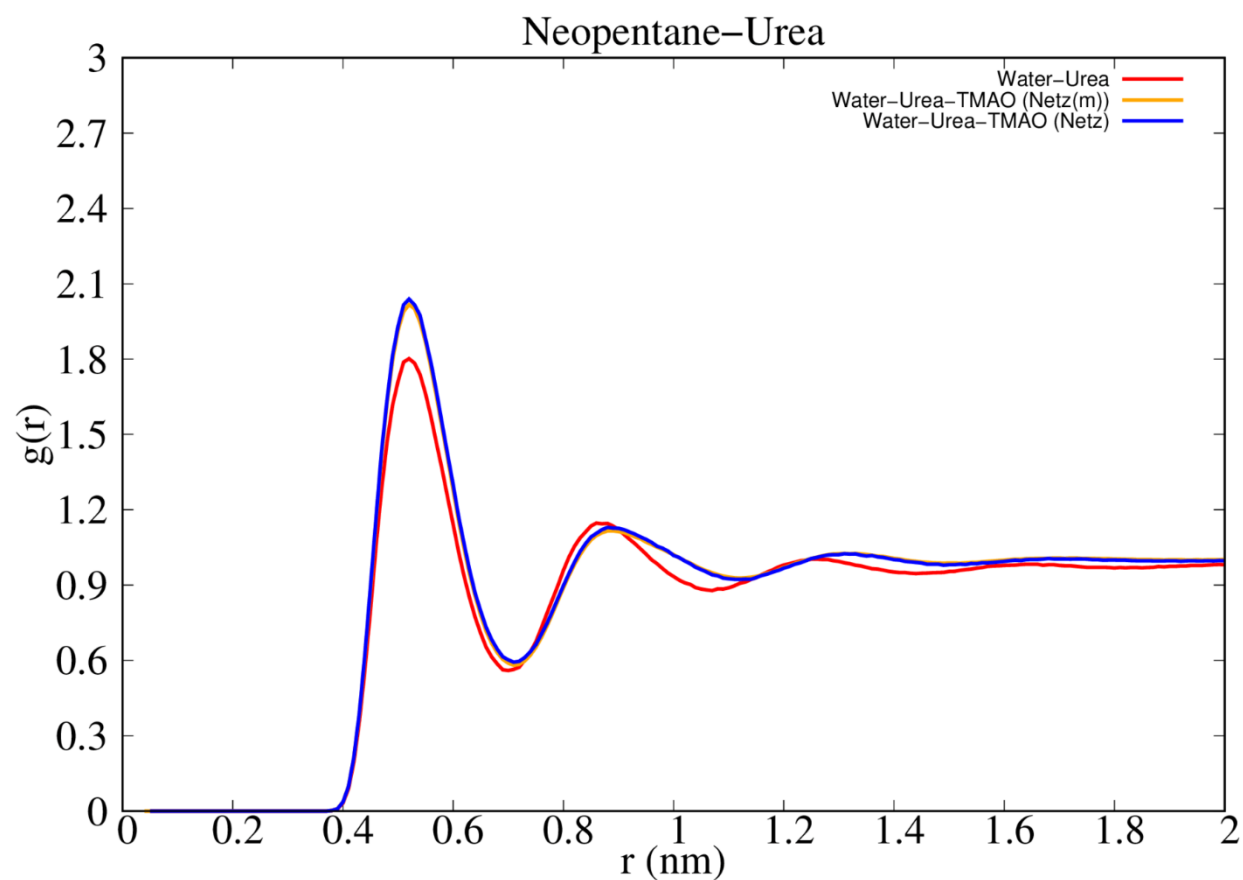

**Fig. S3.** Radial distribution function between neopentane-Urea in Water-Urea, water-Urea-TMAO (Netz(m)) and water-urea-TMAO (Netz) mixtures.

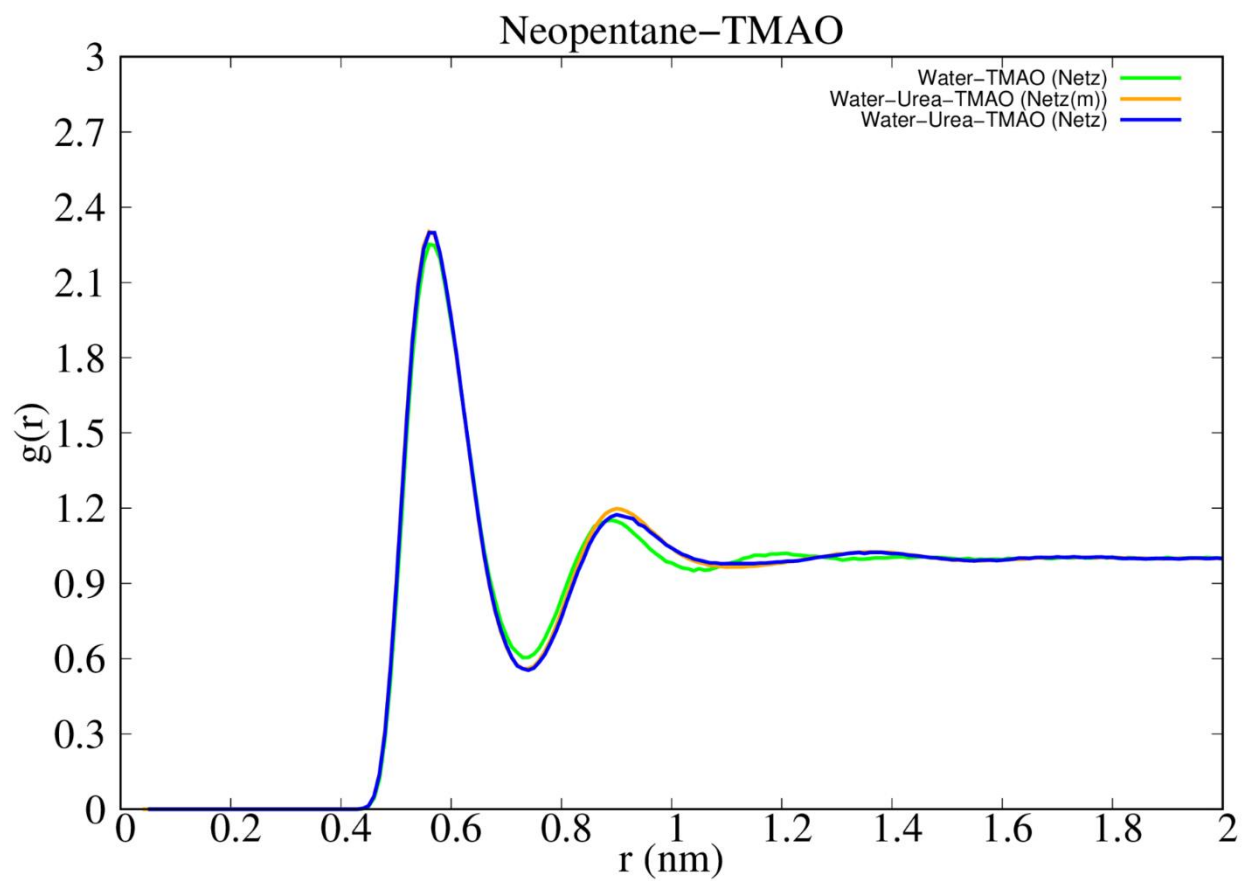

**Fig. S4.** Radial distribution function between neopentane-TMAO in water-TMAO (Netz), water-Urea-TMAO (Netz(m)) and water-urea-TMAO (Netz) mixtures.

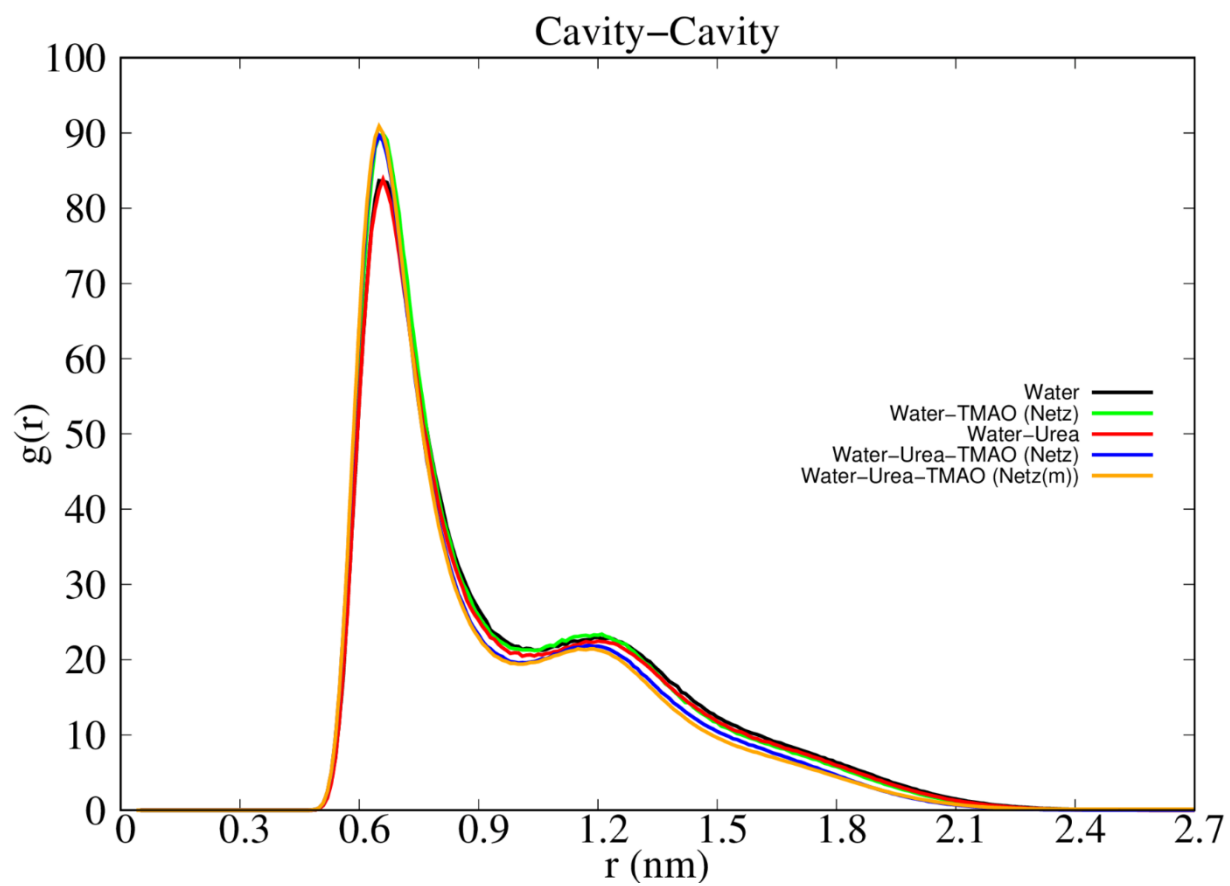

**Fig. S5.** Radial distribution functions between cavity-cavity in water, water-TMAO (Netz), Water-Urea and water-Urea-TMAO (Netz) and water-Urea-TMAO (Netz(m)) mixtures.

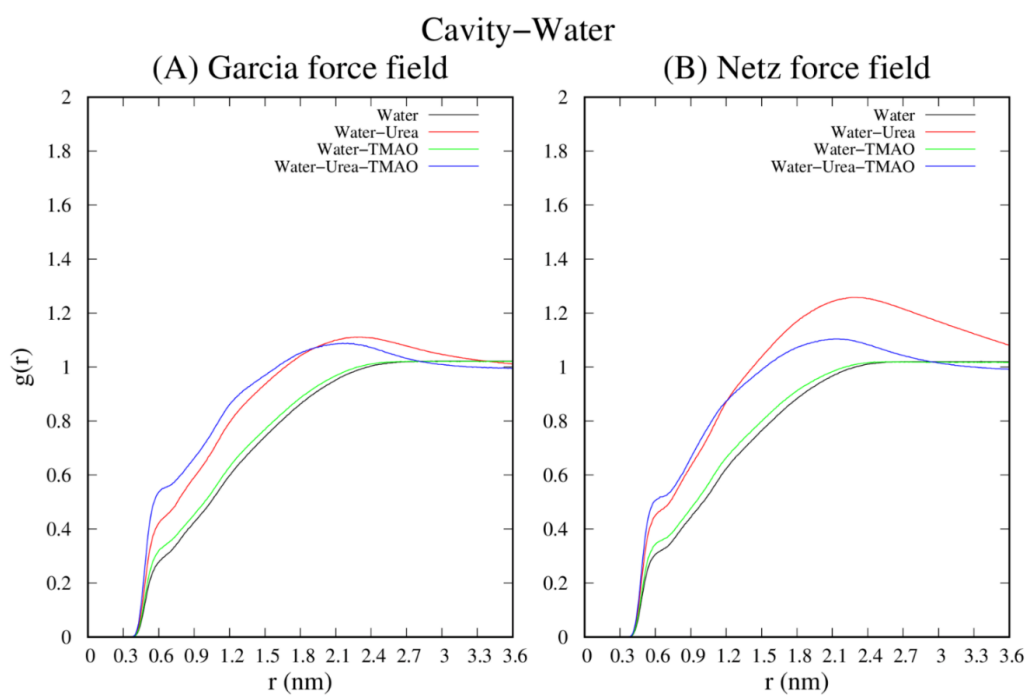

**Fig. S6.** Radial distribution functions between cavity-water in water (w), water-urea (w-ua), water-TMAO (w-ta) and water-urea-TMAO (w-ua-ta) mixtures for Garcia (A) and Netz (B) force fields.

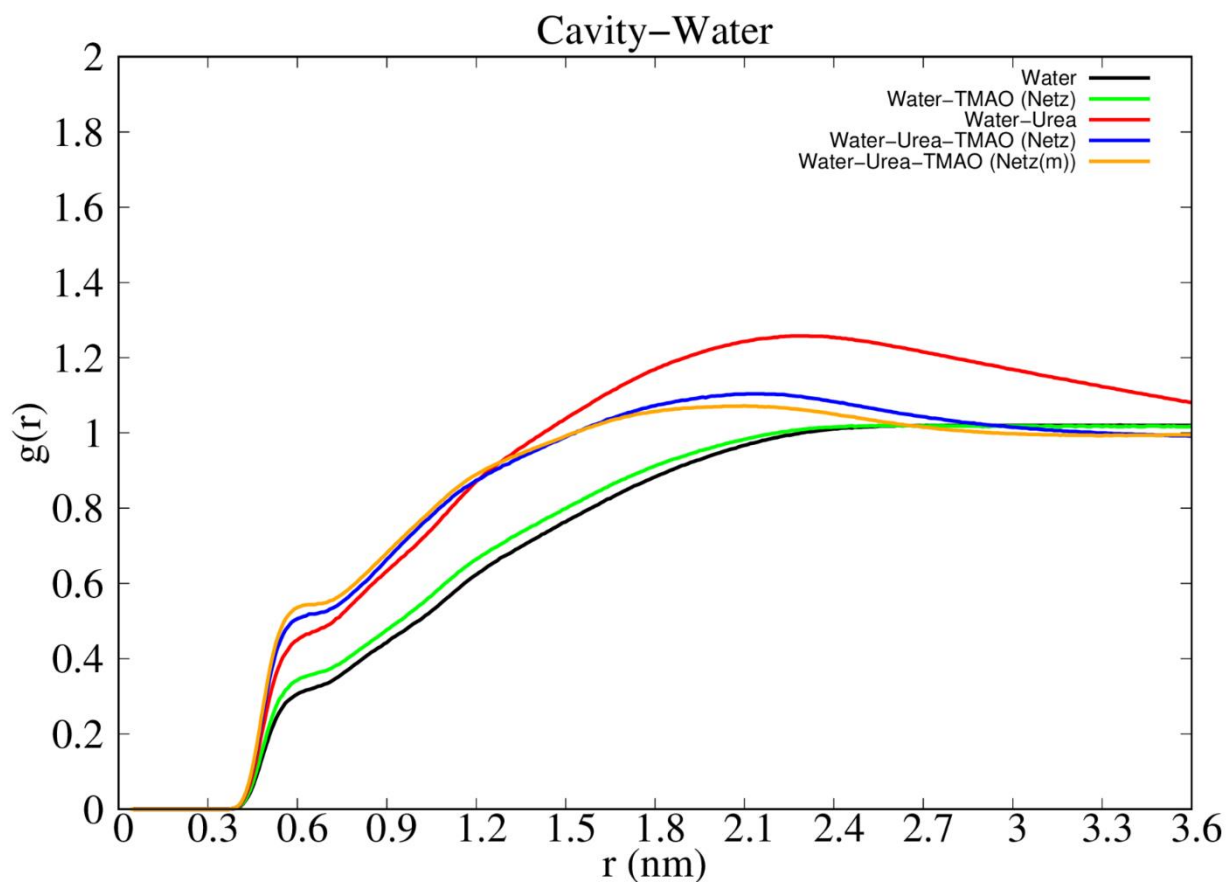

**Fig. S7.** Radial distribution functions between cavity-water in water, water-TMAO (Netz), water-urea, water-urea-TMAO (Netz) and water-urea-TMAO (Netz(m)) mixtures.



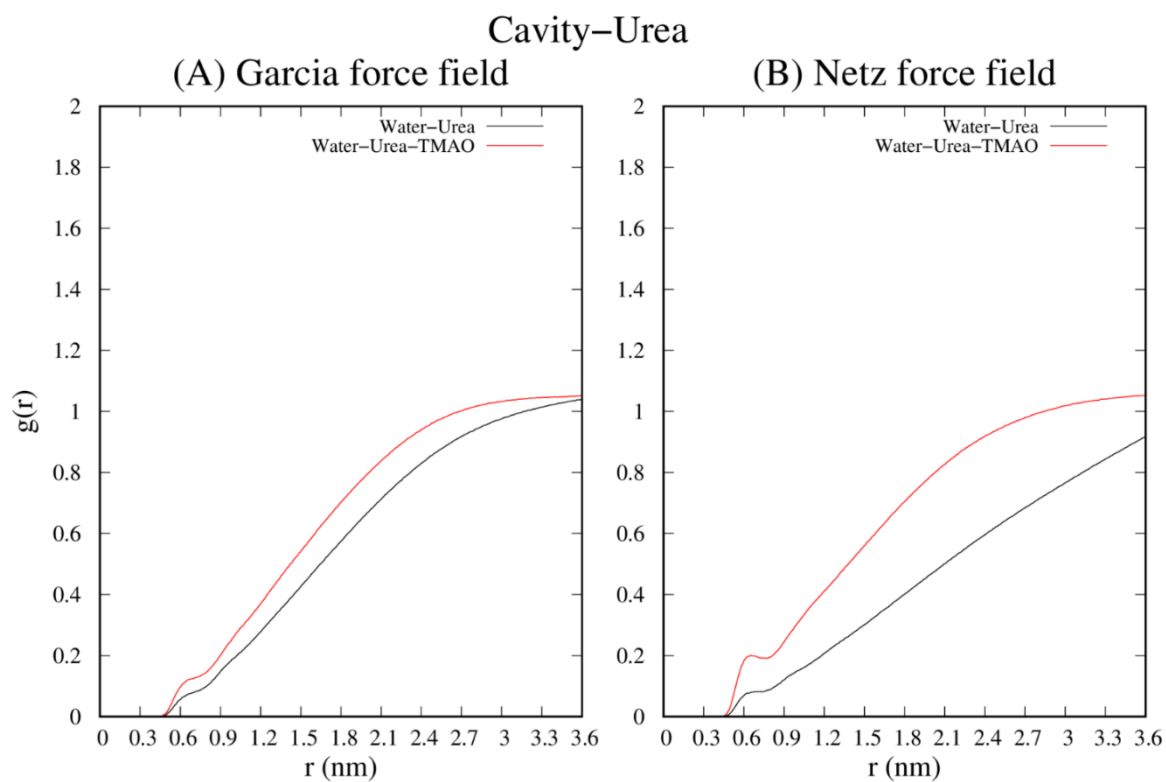

**Fig. S8.** Radial distribution function between cavity-urea in water-urea (w-ua) and water-urea-TMAO (w-ua-ta) mixtures for Garcia (A) and Netz (B) force fields.

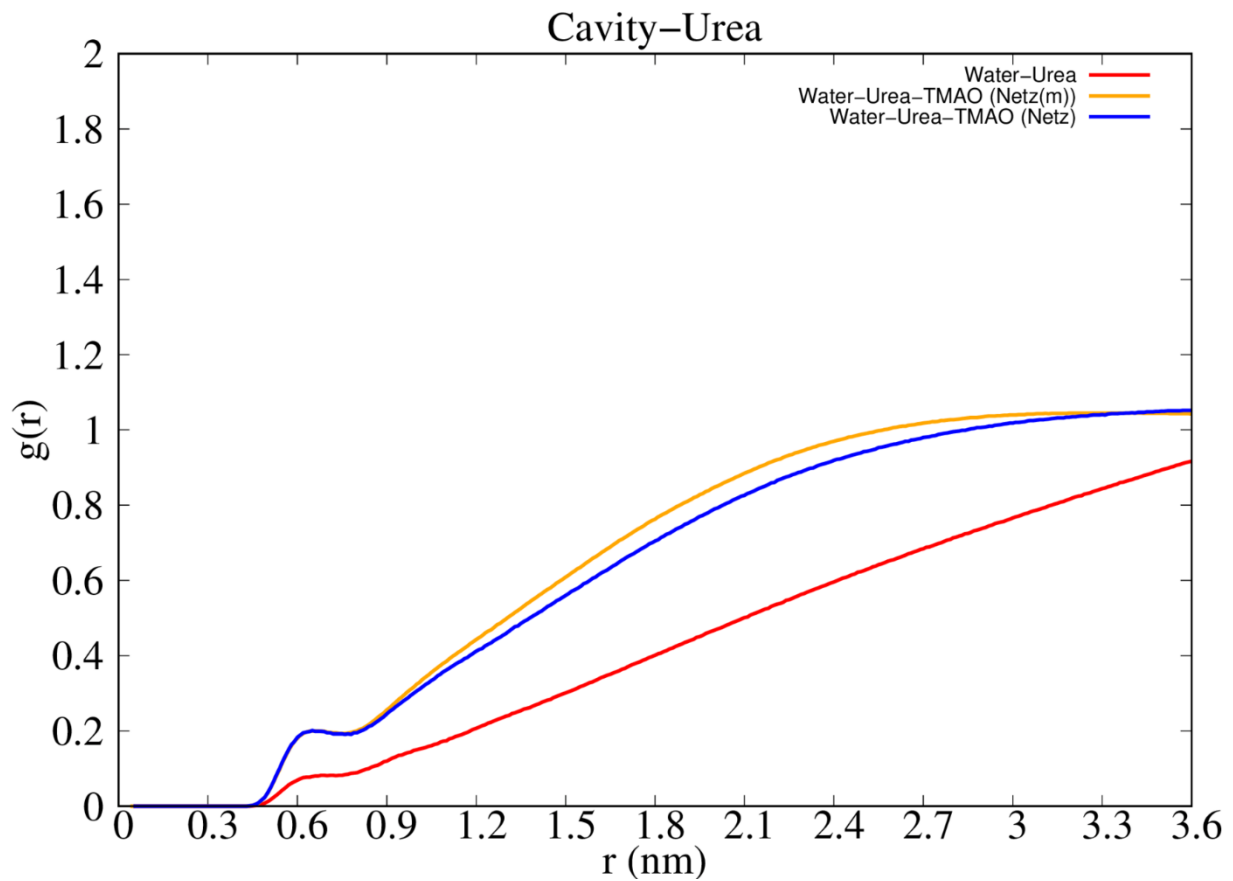

**Fig. S9.** Radial distribution functions between cavity-Urea in in water-TMAO (Netz) and water-urea-TMAO (Netz(m)) and water-urea-TMAO (Netz) mixtures.

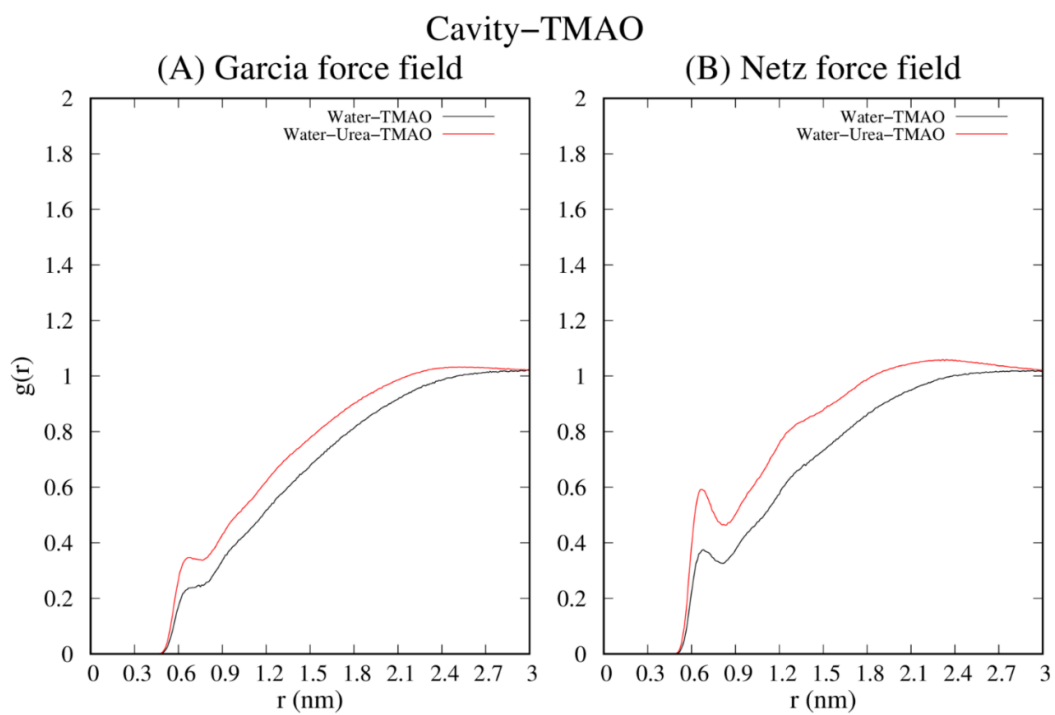

**Fig. S10.** Radial distribution function between cavity- and TMAO molecules in water-TMAO (w-ta) and water-urea-TMAO (w-ua-ta) mixtures for Garcia (A) and Netz (B) force fields.

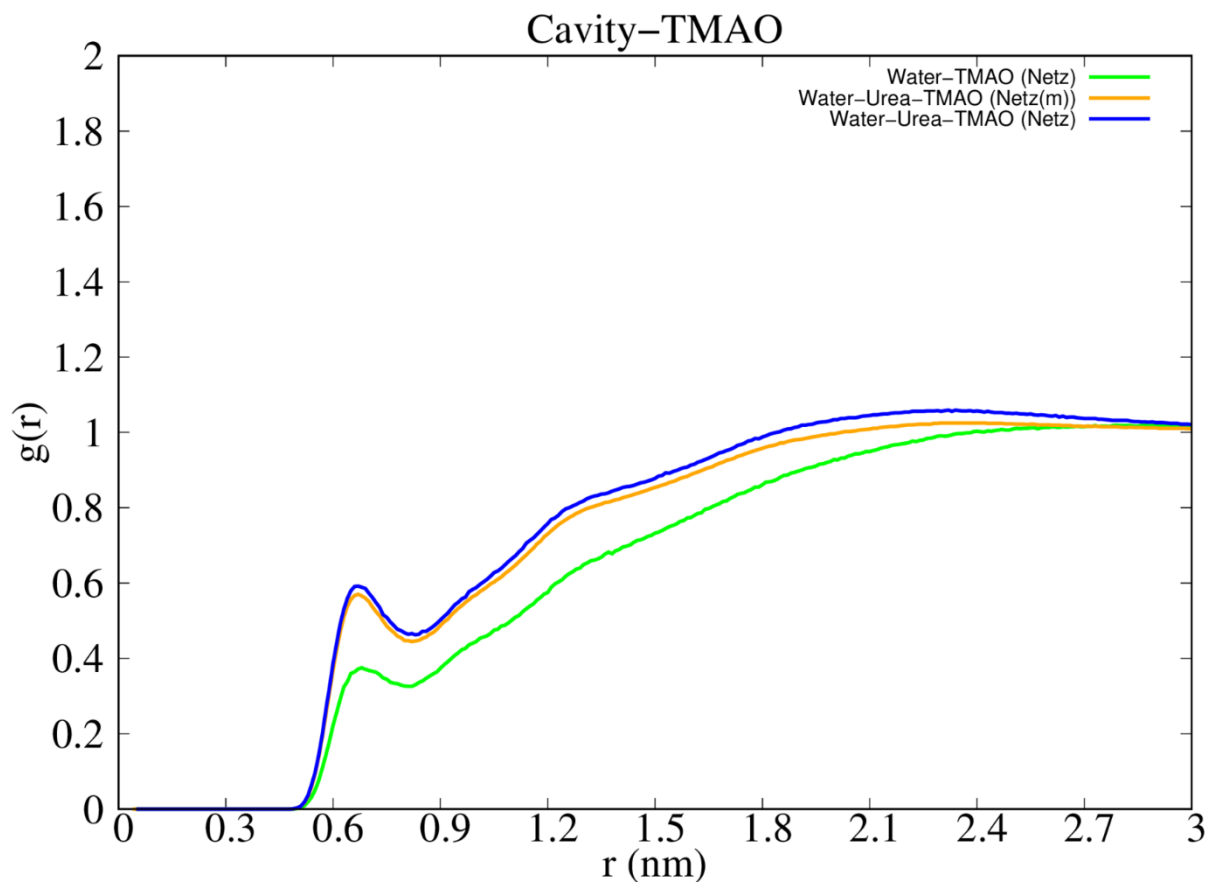

**Fig. S11.** Radial distribution functions between cavity-TMAO in water-TMAO (Netz) and water-urea-TMAO (Netz(m)) and water-urea-TMAO (Netz) mixtures.

**Table S1.** Preferential binding coefficients of neopentane with urea and TMAO cosolvents.

| Mixtures        | Preferential binding coefficients ( $\gamma$ ) |            |            |            |            |            |
|-----------------|------------------------------------------------|------------|------------|------------|------------|------------|
|                 | GARCIA                                         |            | NETZ       |            | NETZ(m)    |            |
|                 | Urea                                           | TMAO       | Urea       | TMAO       | Urea       | TMAO       |
| water-urea      | -2.01±0.07                                     |            | -2.91±0.38 |            |            |            |
| water-TMAO      |                                                | 0.18±0.017 |            | -0.05±0.04 |            |            |
| water-urea-TMAO | -1.56±0.24                                     | -0.12±0.03 | -0.46±0.32 | -0.11±0.05 | -0.88±0.22 | -0.08±0.04 |

**Table S2.** Preferential binding coefficients of cavity with urea and TMAO cosolvents.

| Mixtures        | Preferential binding coefficients ( $\gamma$ ) |            |              |            |             |            |
|-----------------|------------------------------------------------|------------|--------------|------------|-------------|------------|
|                 | GARCIA                                         |            | NETZ         |            | NETZ(m)     |            |
|                 | Urea                                           | TMAO       | Urea         | TMAO       | Urea        | TMAO       |
| water-urea      | -16.57±0.08                                    |            | -19.97±0.118 |            |             |            |
| water-TMAO      |                                                | -2.17±0.03 |              | -1.56±0.04 |             |            |
| water-urea-TMAO | -17.28±0.18                                    | -4.51±0.04 | -14.90±0.43  | -2.30±0.08 | -14.99±0.72 | -3.00±0.12 |

**Table S3.** Solute-solvent interaction energy using Garcia, Netz and Netz(m) force field in water, water-urea, water-TMAO and water-urea-TMAO mixtures. The values are in kJ/mol and errors are less than 1 kJ/mol.

| Solvent         | Interaction Energy ( $E_{\text{total}}$ )/(kJ/mol) |            |               |
|-----------------|----------------------------------------------------|------------|---------------|
|                 | Garcia Model                                       | Netz Model | Netz(m) Model |
| Water           | -34                                                | -36        |               |
| Urea-water      | -39                                                | -41        |               |
| TMAO-water      | -43                                                | -45        |               |
| Urea-TMAO-water | -50                                                | -50        | -51           |

**Table S4.** The excess chemical potential obtained by inserting a methane cavity in water, water-Urea, water-TMAO and water-urea-TMAO mixtures for Netz force field.

| S. No.          | $\Delta G_{\text{cavity}}$ /(kJ/mol) |
|-----------------|--------------------------------------|
| Water           | 37.5±0.5                             |
| Water-Urea      | 41.7±0.4                             |
| Water-TMAO      | 41.4±0.7                             |
| Water-Urea-TMAO | 46.4±1.6                             |

## 1. Running coordination numbers (RCNs)

The running coordination numbers are defined as

$$n_{\alpha\beta} = 4\pi\rho_{\beta} \int_{r_1}^{r_2} r^2 g_{\alpha\beta}(r) dr \quad (\text{S1})$$

where  $n_{\alpha\beta}$  represents the number of atoms of type  $\beta$  surrounding  $\alpha$  in a shell extending from  $r_1$  to  $r_2$  and  $\rho_{\beta}$  is the number density of  $\beta$  type species in the system. In the case of RCNs calculation in first coordination shell,  $r_1$  is zero and  $r_2$  is the first minimum of radial distribution functions (RDFs). For calculations of the RCNs in the second coordination shell,  $r_1$  is the first minimum of the RDFs and  $r_2$  is the second minimum of the RDFs.

**Table S5.** The running coordination numbers (values in the rows) around Neopentane in the 1<sup>st</sup> solvation shell and 2<sup>nd</sup> solvation shell. Here,  $N_{\text{neo}}$ = the number of neopentane molecules.

| Mixtures    | Garcia model                                          |                                                        | Netz model                                            |                                                       |
|-------------|-------------------------------------------------------|--------------------------------------------------------|-------------------------------------------------------|-------------------------------------------------------|
|             | $N_{\text{neo}}$ (in 1 <sup>st</sup> solvation shell) | $N_{\text{neo}}$ (in 2 <sup>nd</sup> solvation Shell ) | $N_{\text{neo}}$ (in 1 <sup>st</sup> solvation shell) | $N_{\text{neo}}$ (in 2 <sup>nd</sup> solvation shell) |
| Iw          | 0.187                                                 | 0.198                                                  | 0.144                                                 | 0.191                                                 |
| IIw-ua      | 0.206                                                 | 0.221                                                  | 0.16                                                  | 0.204                                                 |
| IIIw-tmao   | 0.169                                                 | 0.191                                                  | 0.155                                                 | 0.169                                                 |
| IVw-ua-tmao | 0.217                                                 | 0.225                                                  | 0.212                                                 | 0.200                                                 |

**Table S6.** The running coordination numbers (values in the rows) around Neopentane in the 1<sup>st</sup> solvation shell. Here,  $N_{\text{H}_2\text{O}}$  = the number of water molecules,  $N_{\text{Urea}}$  = the number of urea molecules,  $N_{\text{TMAO}}$  = the number of TMAO molecules.

| Mixtures                | Neopentane               |                   |                   |                          |                   |                   |
|-------------------------|--------------------------|-------------------|-------------------|--------------------------|-------------------|-------------------|
|                         | Garcia                   |                   |                   | Netz                     |                   |                   |
|                         | $N_{\text{H}_2\text{O}}$ | $N_{\text{Urea}}$ | $N_{\text{TMAO}}$ | $N_{\text{H}_2\text{O}}$ | $N_{\text{Urea}}$ | $N_{\text{TMAO}}$ |
| I <sub>w</sub>          | 36.9                     | 0                 | 0                 | 35.8                     | 0                 | 0                 |
| II <sub>w-ua</sub>      | 23.8                     | 6.3               | 0                 | 23.7                     | 6.7               | 0                 |
| III <sub>w-tmao</sub>   | 27.9                     | 0                 | 4.0               | 28.2                     | 0                 | 4.0               |
| IV <sub>w-ua-tmao</sub> | 13.1                     | 7.2               | 4.0               | 14.9                     | 7.4               | 3.8               |

**Table S7.** The running coordination numbers (values in the rows) around repulsive neopentane Cavity. Here,  $N_{\text{H}_2\text{O}}$  = the number of water molecules,  $N_{\text{urea}}$  = the number of urea molecules,  $N_{\text{TMAO}}$  = the number of TMAO molecules.

| Mixtures   | Cavity                   |                   |                   |                          |                   |                   |
|------------|--------------------------|-------------------|-------------------|--------------------------|-------------------|-------------------|
|            | Garcia                   |                   |                   | Netz                     |                   |                   |
|            | $N_{\text{H}_2\text{O}}$ | $N_{\text{Urea}}$ | $N_{\text{TMAO}}$ | $N_{\text{H}_2\text{O}}$ | $N_{\text{Urea}}$ | $N_{\text{TMAO}}$ |
| Cw         | 8.2                      | 0                 | 0                 | 7.3                      | 0                 | 0                 |
| Cw-ua      | 7.6                      | 0.5               | 0                 | 7.1                      | 0.6               | 0                 |
| Cw-tmao    | 6.8                      | 0                 | 1.4               | 6.5                      | 0                 | 1.0               |
| Cw-ua-tmao | 5.0                      | 1.3               | 2.1               | 5.5                      | 0.9               | 1.3               |
